# Supplementary material for: Global Noncoding microRNA Profiling in Mice Infected with Partial Human Mouth Microbes (PAHMM) Using an Ecological Time-Sequential Polybacterial Periodontal Infection (ETSPPI) Model Reveals Sex-Specific Differential microRNA Expression
Source: MDPI journal article supplement (doi:10.3390/ijms23095107), 2022-05-04
Supplement: s1 [file s1]

Article

# Global noncoding microRNA profiling in mice infected with partial human mouth microbes (PAHMM) using an ecological time-sequential polybacterial periodontal infection (ETSPPI) model reveal sex-specific differential microRNA expression

Chairmandurai Aravindraj <sup>1</sup>, Matteen R. Kashef <sup>1</sup>, Krishna Mukesh Vekariya <sup>1</sup>, Ravi K. Ghanta <sup>2</sup>, Shama Karanth <sup>3</sup>, Edward K. L. Chan <sup>4</sup> and Lakshmya Kesavalu <sup>1,4\*</sup>

Supplemental information

Figure S1.

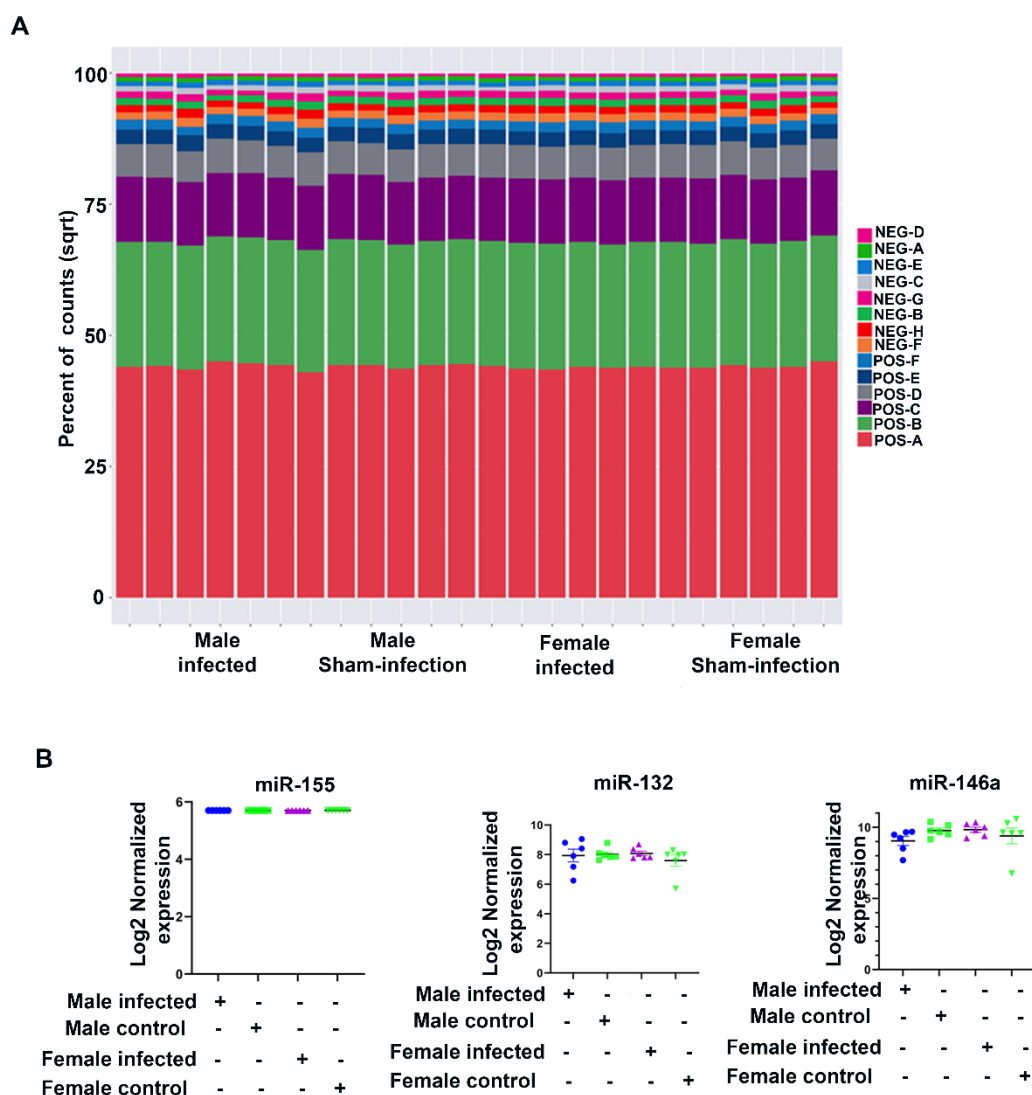

**Figure S1.** NanoString control plot and dominant miRNA expression in PAHMM using ETSPPI mouse model. A. This plot shows the expression levels of spike-ins, negative controls and

housekeeping genes. Each column has been summed to 100%. The expression levels of the controls were more or less similar in all the samples that showed the ligation and hybridization was successful in all the samples during the sample preparation. B. Expression pattern of dominant miRNAs such as miR-155, miR-132 and miR-146a was not observed to be significant in ETSPPI mouse model.

**Table S1.** RNA quantification of mandibles for NanoString analysis

| Sample | 260/280 | 260/230 | ng/ $\mu$ l |
|--------|---------|---------|-------------|
| GI-1   | 2.033   | 2.089   | 188.30      |
| GI-2   | 2.085   | 2.039   | 152.05      |
| GI-3   | 2.117   | 2.011   | 144.95      |
| GI-4   | 2.056   | 2.425   | 224.11      |
| GI-5   | 2.107   | 2.153   | 208.44      |
| GI-6   | 2.074   | 2.179   | 344.48      |
| GII-1  | 2.114   | 2.125   | 533.32      |
| GII-2  | 2.069   | 2.091   | 999.91      |
| GII-3  | 2.1     | 2.088   | 564.03      |
| GII-4  | 2.12    | 2.243   | 258.54      |
| GII-5  | 2.084   | 2.371   | 310.25      |
| GII-6  | 2.099   | 2.235   | 591.70      |
| GIII-1 | 2.078   | 2.0     | 435.20      |
| GIII-2 | 2.086   | 2.017   | 237.49      |
| GIII-3 | 2.108   | 2.228   | 271.41      |
| GIII-4 | 2.082   | 2.241   | 282.74      |
| GIII-5 | 2.076   | 2.153   | 230.39      |
| GIII-6 | 2.051   | 2.219   | 285.48      |
| GIV-1  | 2.097   | 2.166   | 378.13      |
| GIV-2  | 2.074   | 2.404   | 423.07      |
| GIV-3  | 2.077   | 2.44    | 633.68      |
| GIV-4  | 2.045   | 2.563   | 729.69      |
| GIV-5  | 2.098   | 2.339   | 521.42      |
| GIV-6  | 2.02    | 1.993   | 613.68      |

The quality of total RNA extracted from each mandible was high and 100 ng of RNA was taken for Nanostring analysis.
